**S1 Table. Final version of the questionnaire.**

The patient tells you that he/she skips a daily dose of this medication periodically. In your opinion, at what frequency of missing doses is the risk to his/her health unacceptable?

From missing daily doses occurring:

- One day per month
- Two days per month
- Three days per month
- One day per week
- Two days per week
- Three days per week
- The risk is always acceptable regardless the frequency of missing doses
- Other response:
- I do not know
