# Supplementary material for: Acceptable medication non-adherence: A crowdsourcing study among French physicians for commonly prescribed medications
Source: PLOS journal article supplement (doi:10.1371/journal.pone.0209023), 2018-12-13
Supplement: S4 (10.1371/journal.pone.0209023.s004) [file journal.pone.0209023.s004]

**S2 Table. Sensitivity analyses with different cutoffs to define the summary estimate of the TURN (n=112 drug-indication groups).**

| <b>Cutoff *</b> | <b>TURN: frequency of missing doses (days)</b> |                |                |               |               |               | <b>Always acceptable</b> |
|-----------------|------------------------------------------------|----------------|----------------|---------------|---------------|---------------|--------------------------|
|                 | <b>1/month</b>                                 | <b>2/month</b> | <b>3/month</b> | <b>1/week</b> | <b>2/week</b> | <b>3/week</b> |                          |
|                 | <b>-n</b>                                      | <b>-n</b>      | <b>-n</b>      | <b>-n</b>     | <b>-n</b>     | <b>-n</b>     | <b>-n</b>                |
| <b>50% -n</b>   | 5 <sup>a</sup>                                 | 5              | 10             | 35            | 20            | 13            | 24                       |
| <b>60% -n</b>   | 10                                             | 10             | 16             | 31            | 17            | 9             | 19                       |
| <b>75% -n</b>   | 22                                             | 16             | 25             | 20            | 11            | 8             | 10                       |
| <b>80% -n</b>   | 28                                             | 21             | 21             | 22            | 4             | 8             | 8                        |
| <b>90% -n</b>   | 56                                             | 17             | 11             | 17            | 6             | 0             | 5 <sup>b</sup>           |

n corresponds to the number of drug-indication groups

\* the cutoff corresponds to the percentage used to define the summary estimate of the TURN (e.g., for the cutoff highlighted in grey [75%] in the primary analysis, the summary TURN was defined as response category over which 75% of physicians' estimates were located).

<sup>a</sup> Drug-indication groups for which the TURN is "1 day/month" whatever the cut-off: antiepileptics in epilepsy, corticosteroids for prevention against graft rejection, glucocorticoids in adrenal insufficiency, hormonal contraceptives for systemic use, immunosuppressants for prevention against graft rejection

<sup>b</sup> Drug-indication groups for which the TURN is "always acceptable" whatever the cut-off: anti-dementia drugs, anti-rheumatic products for osteoarthritis, other vitamins, urologics for urinary incontinence, progestogens and estrogens in combination for menopause
